# Supplementary figures and images for: Immunotherapy combining tumor and endothelium cell lysis with immune enforcement by recombinant MIP-3α Newcastle disease virus in a vessel-targeting liposome enhances antitumor immunity
Source: PubMed Central journal article supplement — J Immunother Cancer. 2022 Mar 7;10(3):e003950. doi: 10.1136/jitc-2021-003950 (PMC8905871; doi:10.1136/jitc-2021-003950), 2022-03-07

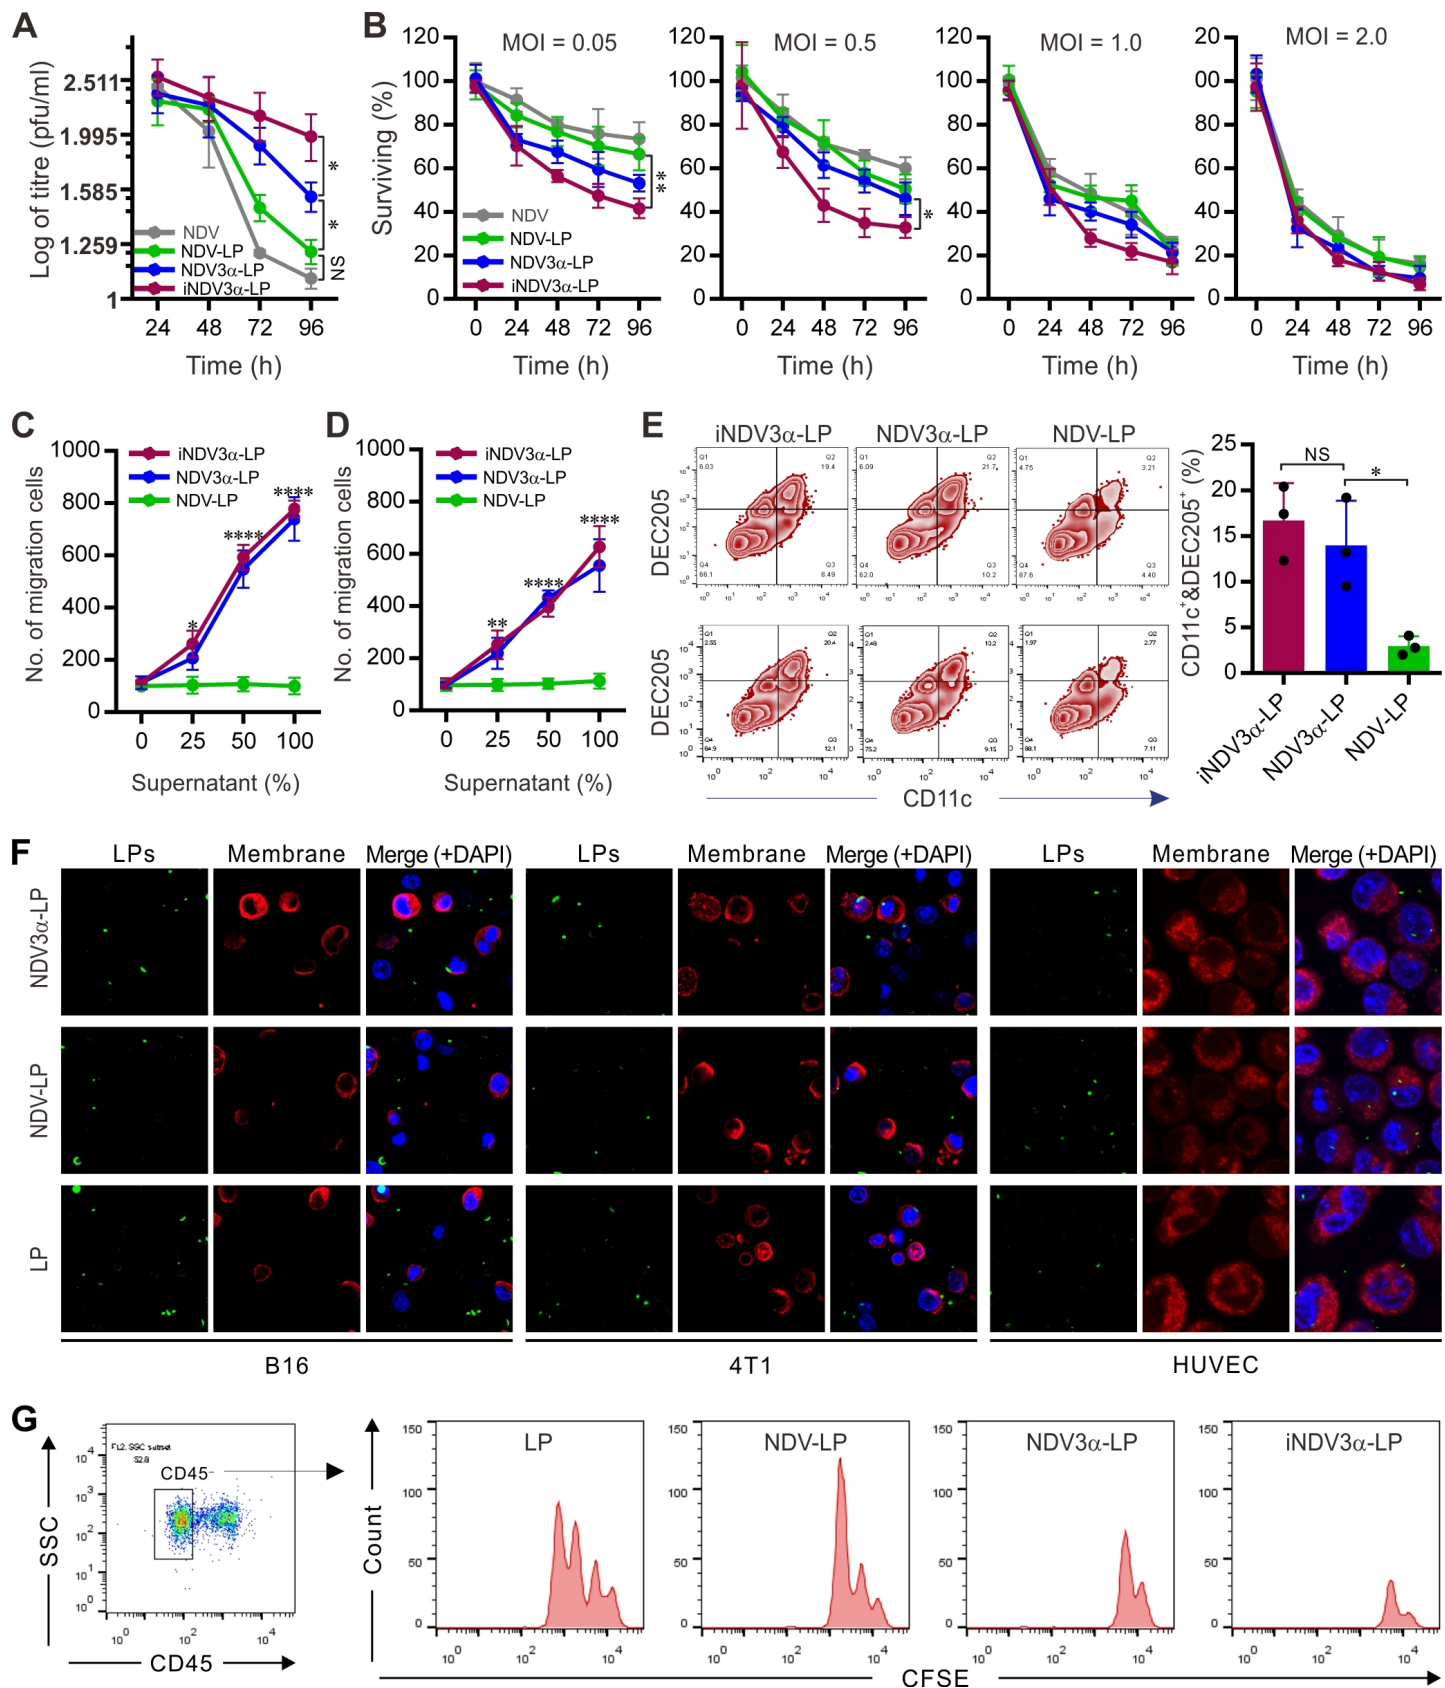

Supplement: jitc-2021-003950supp001.pdf [file jitc-2021-003950supp001.pdf]
